# Supplementary material
Source: PubMed Central journal article supplement (PMC5085606)
Supplement: jciinsight-1-86326-s001.pdf [file jciinsight-1-86326-s001.pdf]

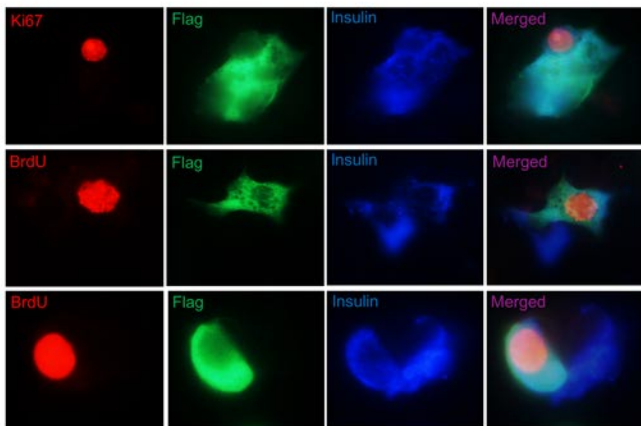

**Supplementary Figure 1. Triple staining of YAP (Flag-tag), insulin and Ki67 or BrdU.** Human islets were transfected with a Flag-YAP for 2 days.  $\beta$ -cell proliferation was analyzed by triple staining for Ki67 or BrdU (red), Flag (green) and insulin (blue).
